# Supplementary material
Source: ML conference proceedings conference paper supplement (https://openaccess.thecvf.com/content/CVPR2024/html/Xie_PhysGaussian_Physics-Integrated_3D_CVPR_2024_paper.html)
Supplement: Supplementary file 1 [file Xie_PhysGaussian_Physics-Integrated_3D_CVPR_2024_supplemental.pdf]

# PhysGaussian: Physics-Integrated 3D Gaussians for Generative Dynamics

## Supplementary Material

### 1. MPM Algorithm

In MPM, a continuum body is discretized into a set of Lagrangian particles  $p$ , and time is discretized into a sequence of time steps  $t = 0, t^1, t^2, \dots$ . Here we take a fixed stepsize  $\Delta t$ , so  $t^n = n\Delta t$ .

At each time step, masses and momentums on particles are first transferred to grid nodes. Grid velocities are then updated using forward Euler’s method and transferred back to particles for subsequent advection. Let  $m_p, \mathbf{x}_p^n, \mathbf{v}_p^n, \mathbf{F}_p^n, \boldsymbol{\tau}_p^n$ , and  $\mathbf{C}_p^n$  denote the mass, position, velocity, deformation gradient, Kirchhoff stress, and affine momentum on particle  $p$  at time  $t_n$ . Here, particle masses are invariant due to mass conservation law. Let  $m_i^n, \mathbf{x}_i^n$  and  $\mathbf{v}_i^n$  denote the mass, position, and velocity on grid node  $i$  at time  $t^n$ . We summarize the explicit MPM algorithm as follows:

- 1. Transfer Particles to Grid.** Transfer mass and momentum from particles to grids as

$$\begin{aligned} m_i^n &= \sum_p w_{ip}^n m_p, \\ m_i^n \mathbf{v}_i^n &= \sum_p w_{ip}^n m_p (\mathbf{v}_p^n + \mathbf{C}_p^n (\mathbf{x}_i - \mathbf{x}_p^n)). \end{aligned} \quad (1)$$

We adopt the APIC scheme [1] for momentum transfer.

- 2. Grid Update.** Update grid velocities based on forces at the next timestep by

$$\mathbf{v}_i^{n+1} = \mathbf{v}_i^n - \frac{\Delta t}{m_i} \sum_p \boldsymbol{\tau}_p^n \nabla w_{ip}^n V_p^0 + \Delta t \mathbf{g}. \quad (2)$$

- 3. Transfer Grid to Particles.** Transfer velocities back to particles and update particle states.

$$\begin{aligned} \mathbf{v}_p^{n+1} &= \sum_i \mathbf{v}_i^{n+1} w_{ip}^n, \\ \mathbf{x}_p^{n+1} &= \mathbf{x}_p^n + \Delta t \mathbf{v}_p^{n+1}, \\ \mathbf{C}_p^{n+1} &= \frac{12}{\Delta x^2 (b+1)} \sum_i w_{ip}^n \mathbf{v}_i^{n+1} (\mathbf{x}_i^n - \mathbf{x}_p^n)^T, \\ \nabla \mathbf{v}_p^{n+1} &= \sum_i \mathbf{v}_i^{n+1} \nabla w_{ip}^n{}^T, \\ \mathbf{F}_p^{E, \text{tr}} &= (\mathbf{I} + \nabla \mathbf{v}_p^{n+1}) \mathbf{F}_p^{E, n}, \\ \mathbf{F}_p^{E, n+1} &= \mathcal{Z}(\mathbf{F}_p^{E, \text{tr}}), \\ \boldsymbol{\tau}_p^{n+1} &= \boldsymbol{\tau}(\mathbf{F}_p^{E, n+1}). \end{aligned} \quad (3)$$

Here  $b$  is the B-spline degree, and  $\Delta x$  is the Eulerian grid spacing. The computation of the return map  $\mathcal{Z}$  and the Kirchhoff stress  $\boldsymbol{\tau}$  is outlined in Sec. 2. We refer

Table 1. Model Settings.

| Scene      | Figure          | Constitutive Model |
|------------|-----------------|--------------------|
| Vasedeck   | Fig. 1          | Fixed corotated    |
| Ficus      | Fig. 2          | Fixed corotated    |
| Fox        | Fig. 3          | Fixed corotated    |
| Plane      | Fig. 3          | von Mises          |
| Toast      | Fig. 3          | Fixed corotated    |
| Ruins      | Fig. 3          | Drucker-Prager     |
| Jam        | Fig. 3          | Herschel-Bulkley   |
| Sofa Suite | Fig. 3          | Fixed corotated    |
| Materials  | Fig. 6          | Fixed corotated    |
| Microphone | Fig. 7          | Neo-Hookean        |
| Bread      | Fig. 1 in Supp. | Fixed corotated    |
| Cake       | Fig. 1 in Supp. | Herschel-Bulkley   |
| Can        | Fig. 1 in Supp. | von Mises          |
| Wolf       | Fig. 1 in Supp. | Drucker-Prager     |

Table 2. Material Parameters.

| Notation  | Meaning         | Relation to $E, \nu$                     |
|-----------|-----------------|------------------------------------------|
| $E$       | Young’s modulus | /                                        |
| $\nu$     | Poisson’s ratio | /                                        |
| $\mu$     | Shear modulus   | $\mu = \frac{E}{2(1+\nu)}$               |
| $\lambda$ | Lamé modulus    | $\lambda = \frac{E\nu}{(1+\nu)(1-2\nu)}$ |
| $\kappa$  | Bulk modulus    | $\kappa = \frac{E}{3(1-2\nu)}$           |

the readers to [2] for the detailed derivations from the continuous conservation law to its MPM discretization.

### 2. Elasticity and Plasticity Models

We adopt the constitutive models used in [7]. We list the models used for each scene in Tab. 1 and summarize all the parameters needed in discussing the constitutive models in Tab. 2.

In all plasticity models used in our work, the deformation gradient is multiplicatively decomposed into  $\mathbf{F} = \mathbf{F}^E \mathbf{F}^P$  following some yield stress condition. A hyperelastic constitutive model is applied to  $\mathbf{F}^E$  to compute the Kirchhoff stress  $\boldsymbol{\tau}$ . For a pure elastic continuum, we simply take  $\mathbf{F}^E = \mathbf{F}$ .

#### 2.1. Fixed Corotated Elasticity

The Kirchhoff stress  $\boldsymbol{\tau}$  is defined as

$$\boldsymbol{\tau} = 2\mu(\mathbf{F}^E - \mathbf{R})\mathbf{F}^{E^T} + \lambda(J - 1)\mathbf{J}, \quad (4)$$

where  $\mathbf{R} = \mathbf{U}\mathbf{V}^T$  and  $\mathbf{F}^E = \mathbf{U}\boldsymbol{\Sigma}\mathbf{V}^T$  is the singular value decomposition of elastic deformation gradient.  $J$  is the de-

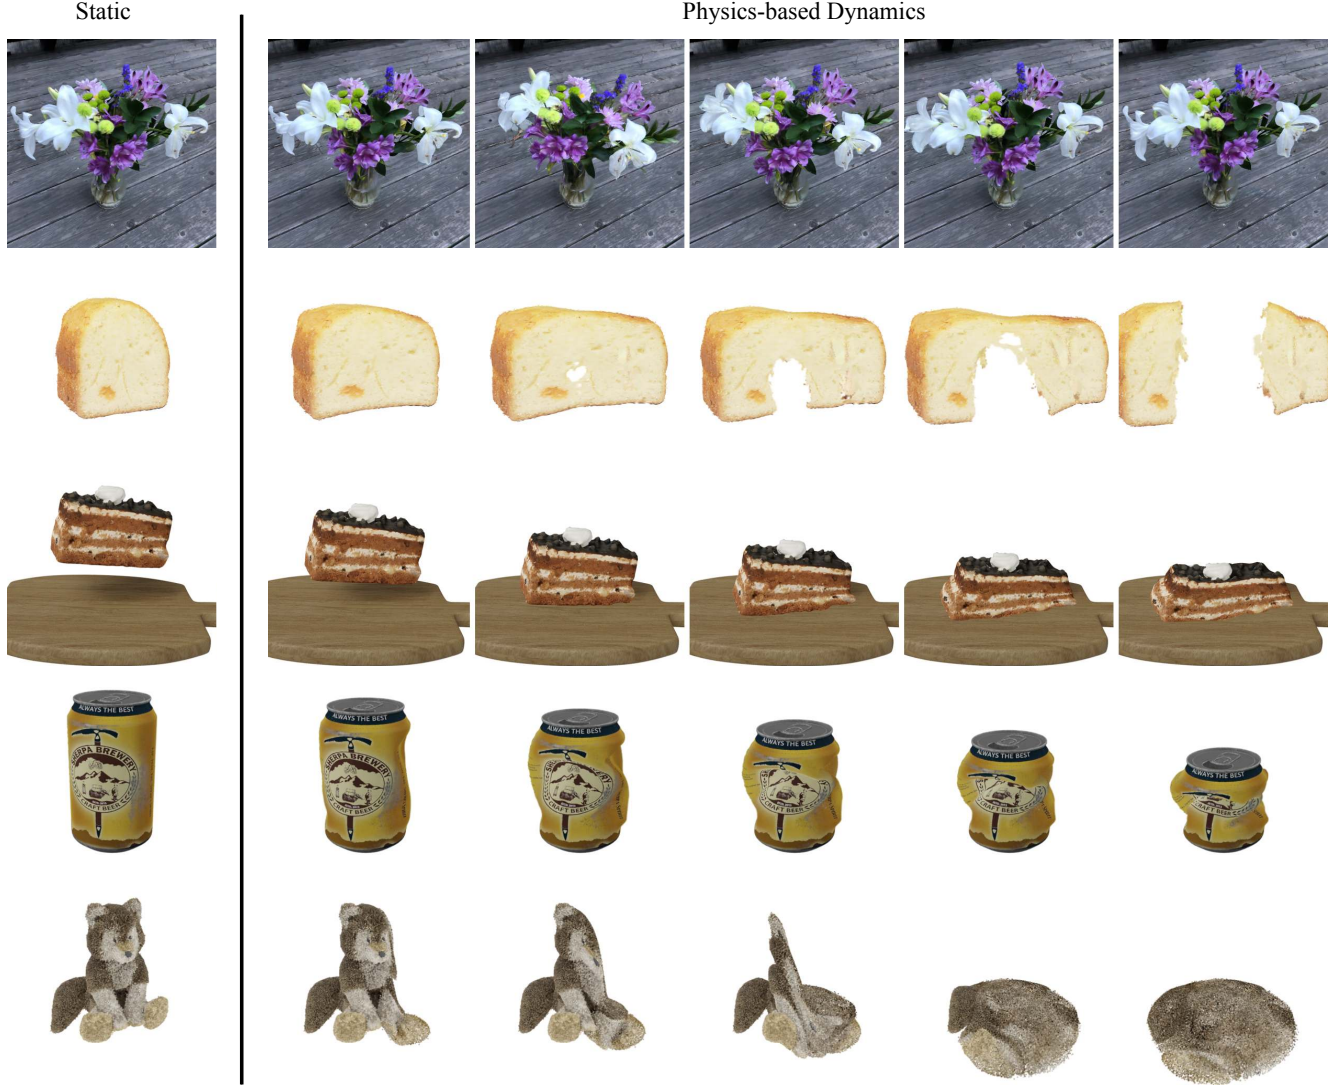

Figure 1. **Additional Evaluation.** Examples from top to bottom are: *vasedeck* (elastic entity), *bread* (fracture), *cake* (viscoplastic material), *can* (plastic metal) and *wolf* (granular material).

terminant of  $F^E$  [1].

## 2.2. StVK Elasticity

The Kirchhoff stress  $\tau$  is defined as

$$\tau = U (2\mu\epsilon + \lambda \text{sum}(\epsilon)\mathbf{1}) V^T, \quad (5)$$

where  $\epsilon = \log(\Sigma)$  and  $F^E = U\Sigma V^T$  [3].

## 2.3. Neo-Hookean Elasticity

The Kirchhoff stress  $\tau$  is defined as

$$\tau = \mu(F^E F^{E^T} - \mathbf{I}) + \log(J)\mathbf{I}, \quad (6)$$

where  $J$  is the determinant of  $F^E$  [1].

## 2.4. Drucker-Prager Plasticity

The return mapping of Drucker-Prager plasticity for sand [3] is, given  $F = U\Sigma V^T$  and  $\epsilon = \log(\Sigma)$ ,

$$F^E = U Z(\Sigma) V^T, \quad (7)$$

$$Z(\Sigma) = \begin{cases} 1, & \text{sum}(\epsilon) > 0, \\ \Sigma, & \delta\gamma \leq 0, \text{ and } \text{sum}(\epsilon) \leq 0, \\ \exp\left(\epsilon - \delta\gamma \frac{\hat{\epsilon}}{\|\hat{\epsilon}\|}\right), & \text{otherwise.} \end{cases} \quad (8)$$

Here  $\delta\gamma = \|\hat{\epsilon}\| + \alpha \frac{(d\lambda + 2\mu) \text{sum}(\epsilon)}{2\mu}$ ,  $\alpha = \sqrt{\frac{2}{3} \frac{2 \sin \phi_f}{3 - \sin \phi_f}}$ , and  $\phi_f$  is the friction angle.  $\hat{\epsilon} = \text{dev}(\epsilon)$ .

## 2.5. Von-Mises Plasticity

Similar to Drucker-Prager plasticity, given  $\mathbf{F} = \mathbf{U}\boldsymbol{\Sigma}\mathbf{V}^T$  and  $\boldsymbol{\epsilon} = \log(\boldsymbol{\Sigma})$ ,

$$\mathbf{F}^E = \mathbf{U}\mathcal{Z}(\boldsymbol{\Sigma})\mathbf{V}^T,$$

where

$$\mathcal{Z}(\boldsymbol{\Sigma}) = \begin{cases} \boldsymbol{\Sigma}, & \delta\gamma \leq 0, \\ \exp\left(\boldsymbol{\epsilon} - \delta\gamma \frac{\hat{\boldsymbol{\epsilon}}}{\|\hat{\boldsymbol{\epsilon}}\|}\right), & \text{otherwise,} \end{cases} \quad (9)$$

and  $\delta\gamma = \|\hat{\boldsymbol{\epsilon}}\|_F - \frac{\tau_Y}{2\mu}$ . Here  $\tau_Y$  is the yield stress.

## 2.6. Herschel-Bulkley Plasticity

We follow Yue et al. [6] and take the simple case where  $h = 1$ . Denote  $\mathbf{s}^{\text{trial}} = \text{dev}(\boldsymbol{\tau}^{\text{trial}})$ , and  $s^{\text{trial}} = \|\mathbf{s}^{\text{trial}}\|$ . The yield condition is  $\Phi(s) = s - \sqrt{\frac{2}{3}}\sigma_Y \leq 0$ . If it is violated, we modify  $s^{\text{trial}}$  by

$$s = s^{\text{trial}} - \left( s^{\text{trial}} - \sqrt{\frac{2}{3}}\sigma_Y \right) / \left( 1 + \frac{\eta}{2\mu\Delta t} \right).$$

$\mathbf{s}$  can then be recovered as  $\mathbf{s} = s \cdot \frac{\mathbf{s}^{\text{trial}}}{\|\mathbf{s}^{\text{trial}}\|}$ . Define  $\mathbf{b}^E = \mathbf{F}^E \mathbf{F}^{E^T}$ . The Kirchhoff stress  $\boldsymbol{\tau}$  is computed as

$$\boldsymbol{\tau} = \frac{\kappa}{2} (J^2 - 1) \mathbf{I} + \mu \text{dev} \left[ \det(\mathbf{b}^E)^{-\frac{1}{3}} \mathbf{b}^E \right].$$

## 3. Additional Evaluations

We present additional evaluations of our method in Fig. 1. The *vasedeck* data is from the Nerf dataset [4] and the others are synthetic data, generated using BlenderNeRF [5].

## References

- [1] Chenfanfu Jiang, Craig Schroeder, Andrew Selle, Joseph Teran, and Alexey Stomakhin. The affine particle-in-cell method. *ACM Transactions on Graphics (TOG)*, 34(4):1–10, 2015. 1, 2
- [2] Chenfanfu Jiang, Craig Schroeder, Joseph Teran, Alexey Stomakhin, and Andrew Selle. The material point method for simulating continuum materials. In *Acm siggraph 2016 courses*, pages 1–52. 2016. 1
- [3] Gergely Klár, Theodore Gast, Andre Pradhana, Chuyuan Fu, Craig Schroeder, Chenfanfu Jiang, and Joseph Teran. Drucker-prager elastoplasticity for sand animation. *ACM Transactions on Graphics (TOG)*, 35(4):1–12, 2016. 2
- [4] Ben Mildenhall, Pratul P Srinivasan, Matthew Tancik, Jonathan T Barron, Ravi Ramamoorthi, and Ren Ng. Nerf: Representing scenes as neural radiance fields for view synthesis. *Communications of the ACM*, 65(1):99–106, 2021. 3
- [5] Maxime Raafat. BlenderNeRF, 2023. 3
- [6] Yonghao Yue, Breannan Smith, Christopher Batty, Changxi Zheng, and Eitan Grinspun. Continuum foam: A material point method for shear-dependent flows. *ACM Transactions on Graphics (TOG)*, 34(5):1–20, 2015. 3
- [7] Zeshun Zong, Xuan Li, Minchen Li, Maurizio M Chiaramonte, Wojciech Matusik, Eitan Grinspun, Kevin Carlberg, Chenfanfu Jiang, and Peter Yichen Chen. Neural stress fields for reduced-order elastoplasticity and fracture. *arXiv preprint arXiv:2310.17790*, 2023. 1
